# Supplementary material
Source: Royal Society of Chemistry journal article supplement (doi:10.1039/d6ay00583g)
Supplement: d6ay00583g1.pdf [file d6ay00583g1.pdf]

## Supplementary Information (ESI)

### S1. Experimental Data and Replicates

Time measurements were recorded for varying ionic concentrations. Each condition was measured with five independent replicates ( $n = 5$ ).

Table S1. Raw experimental data (time in seconds)

| Concentration (M) | Replicate 1 | Replicate 2 | Replicate 3 | Replicate 4 | Replicate 5 |
|-------------------|-------------|-------------|-------------|-------------|-------------|
| 0.01              | 16          | 16          | 18          | 17          | 17          |
| 0.03              | 8           | 11          | 14          | 12          | 12          |
| 0.04              | 12          | 15          | 8           | 10          | 12          |
| 0.05              | 5           | 6           | 8           | 5           | 6           |
| 0.10              | 4           | 5           | 6           | 4           | 4           |
| 0.15              | 4           | 5           | 5           | 3           | 4           |

### S2. Processed Data

Mean values were calculated from the five replicates for each concentration.

Table S2. Averaged data

| Concentration (M) | Time (s) |
|-------------------|----------|
| 0.01              | 16.8     |
| 0.03              | 11.4     |
| 0.04              | 11.4     |
| 0.05              | 6.0      |
| 0.10              | 4.6      |
| 0.15              | 4.2      |

### S3. Statistical Analysis

Standard deviation (SD) was calculated to assess variability.

Table S3. Mean and standard deviation

| Concentration (M) | Mean Time (s) | Standard Deviation (s) |
|-------------------|---------------|------------------------|
| 0.01              | 16.8          | 0.84                   |
| 0.03              | 11.4          | 2.19                   |
| 0.04              | 11.4          | 2.41                   |
| 0.05              | 6.0           | 1.22                   |
| 0.10              | 4.6           | 0.89                   |
| 0.15              | 4.2           | 0.84                   |

#### S4. Observed Trends

A decrease in time was observed with increasing ionic concentration. The trend shows:

- A sharp decline between 0.01 M and 0.05 M
- A plateau region beyond 0.05 M (~4–5 s)
- Increased variability at intermediate concentrations (0.03–0.04 M)

This behavior suggests a non-linear dependence of time on ionic concentration, with possible saturation or limiting effects at higher concentrations.

Supplementary Table 1

| Technique                                                 | LOD    | Sensitivity                                                                     | Response Time | Complexity                                                                                                                     | Sources of Error                                                                                                             | Citation |
|-----------------------------------------------------------|--------|---------------------------------------------------------------------------------|---------------|--------------------------------------------------------------------------------------------------------------------------------|------------------------------------------------------------------------------------------------------------------------------|----------|
| <b>Potentiometric ISE (Na<sup>+</sup>, K<sup>+</sup>)</b> | ~1 mM  | 59.7 ± 0.8 mV/decade (Na <sup>+</sup> ); 57.8 ± 0.9 mV/decade (K <sup>+</sup> ) | <10 s         | High - requires reference electrode, ion-selective membrane, signal conditioning electronics, and wireless transmission module | Electrode drift, biofouling of membrane, reference electrode instability, sweat pH interference, skin motion artefacts       | [8]      |
| <b>Colorimetric microfluidic (Cl<sup>-</sup>)</b>         | 8.3 mM | Calibration curve-dependent                                                     | Minutes       | Moderate - requires microfluidic fabrication, colorimetric reagents, and smartphone image analysis software                    | Ambient lighting variation affecting RGB readout, reagent degradation over time, non-uniform sweat filling of microchannels, | [9]      |

|                                          |       |                                                                                                                 |       |                                                                                                             |                                                                                                                                                |           |
|------------------------------------------|-------|-----------------------------------------------------------------------------------------------------------------|-------|-------------------------------------------------------------------------------------------------------------|------------------------------------------------------------------------------------------------------------------------------------------------|-----------|
|                                          |       |                                                                                                                 |       |                                                                                                             | image processing error                                                                                                                         |           |
| <b>Bubble rupture sensor (this work)</b> | 0.01M | 376.7 s mol <sup>-1</sup> L at 0.01 mol L <sup>-1</sup> ; 7.6 s mol <sup>-1</sup> L at 0.15 mol L <sup>-1</sup> | ~60 s | Minimal -requires only SDS-glycerol bubble solution, no electrodes, no reagents, no electronic transduction | Ambient humidity and temperature variation, inconsistent bubble volume, non-uniform analyte deposition, stochastic nature of thin film rupture | This work |
